# Supplementary material
Source: PubMed Central journal article supplement (PMC7868755)
Supplement: ajcr0011-0370-f11.pdf [file ajcr0011-0370-f11.pdf]

## β-elemene promotes glioma cells senescence

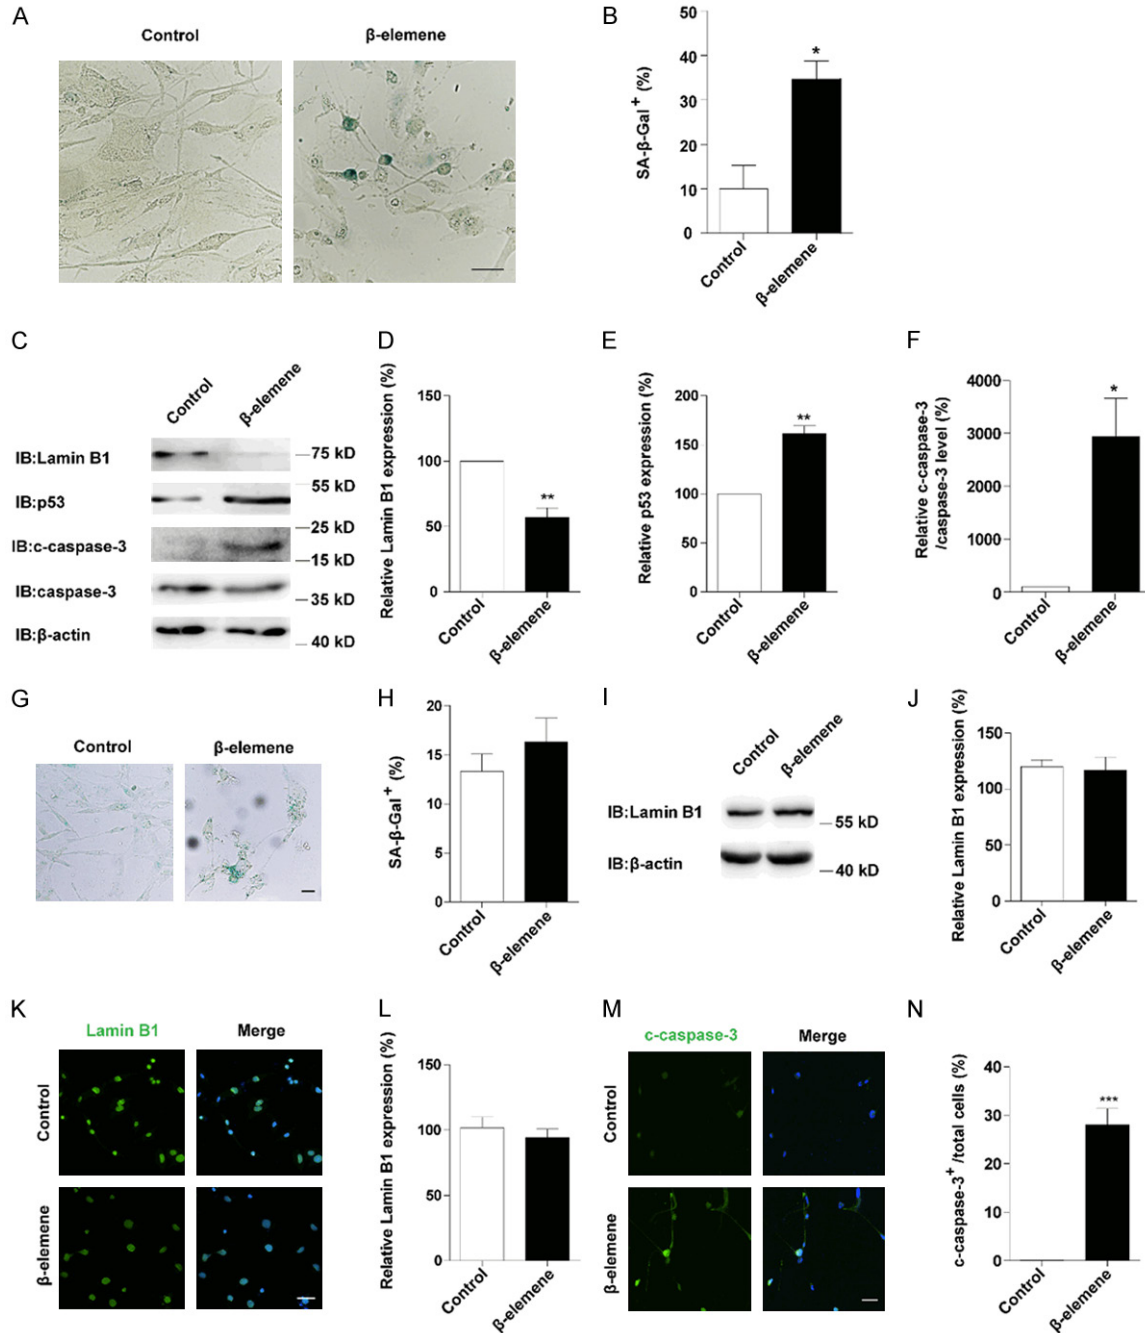

**Figure S1.** High concentration of β-elemene increased apoptosis of glioma cells. (A) Representative images of SA-β-Gal staining of C6 cells treated with control or 100 μg/mL β-elemene for 1 day. (B) Quantification of the percentage of SA-β-Gal<sup>+</sup> C6 cells over total cells as shown in (A) (n=15). (C) Western blot detected the expression of Lamin B1, p53, caspase-3, and c-caspase-3 in C6 cells treated with control or 100 μg/mL β-elemene for 1 day. (D-F) Quantification of Lamin B1 (D), p53 (E), and c-caspase-3/caspase-3 (F) (n=8) levels as shown in (C). (G) Representative images of SA-β-Gal staining of C6 cells treated with control or 100 μg/mL β-elemene for 2 days. (H) Quantification of the percentage of SA-β-Gal<sup>+</sup> C6 cells over total cells as shown in (G) (n=15). (I) Western blot detected the expression of Lamin B1 in C6 cells treated with control or 100 μg/mL β-elemene for 2 days. (J) Quantification of Lamin B1 level as shown in (I) (n=8). (K) Representative images of Lamin B1 staining of C6 cells treated with control or 100 μg/mL β-elemene for 2 days. (L) Quantification of the percentage of Lamin B1<sup>+</sup> C6 cells over total cells as shown in (K) (n=15). (M) Representative images of c-caspase-3 staining of C6 cells treated with control or 100 μg/mL β-elemene for 2 days. (N) Quantification of the percentage of c-caspase-3<sup>+</sup> C6 cells over total cells as shown in (M) (n=15). Scale bars, 20 μm. Data were mean ± s.e.m, \**P* < 0.05, \*\**P* < 0.01, \*\*\**P* < 0.001.

## $\beta$ -elemene promotes glioma cells senescence

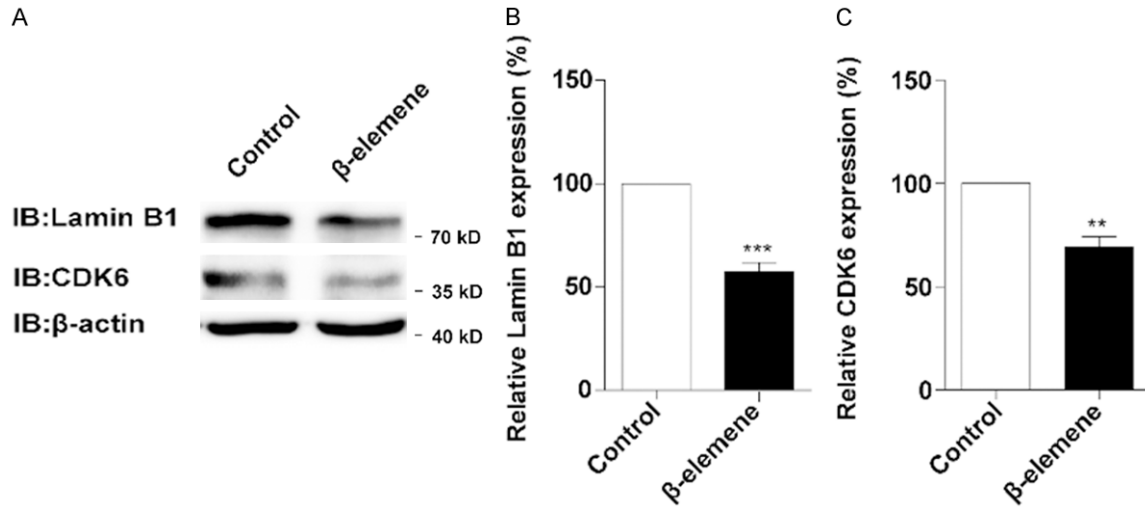

**Figure S2.**  $\beta$ -elemene induced changes of senescence makers in other glioma cell line. (A) Western blot detected the expression of Lamin B1 and CDK6 in DBTRG cells treated with control or 10  $\mu$ g/mL  $\beta$ -elemene for 2 days. (B, C) Quantification of the relative Lamin B1 (B) and CDK6 (C) levels as shown in (A) (n=3). Data were mean  $\pm$  s.e.m. \*\* $P$  < 0.01, \*\*\* $P$  < 0.001.
